# Supplementary material
Source: publisher figshare collection journal article supplement (https://gsajournals.figshare.com/ndownloader/files/26016638)
Supplement: Supplementary file 1 [file 26016638]

## Sheet: table S3
Table S3. lin-41 bulge-SM+SUP sequences and MFEs with all let-7-family microRNAs.
Species	Bulge-SM+SUP sequence	Distance (nt) from stop codon	MFE (kcal/mol) with let-7 microRNA	MFE (kcal/mol) with miR-48	MFE (kcal/mol) with miR-84	MFE (kcal/mol) with miR-241	MFE (kcal/mol) with miR-795	MFE (kcal/mol) with miR-12463
C. zanzibari	GUACCCCUUUAUACAACCGUUCUACACUCA	520	-27.2	-14.6	-17.7	-15.9	no mir-795	no mir-12463
C. tribulationis	GUACCCCUUUAUACAACCGUUCUACACUCA	520	-27.2	-14.6	-17.7	-15.9	no mir-795	no mir-12463
C. sinica	UACACCCCUUAUACAACCGUUCUACACUCA	720	-27.1	-14.6	-16.1	-16.2	no mir-795	no mir-12463
C. nigoni	GUACCCCUUUAUACAACCGUUCUACACUCA	488	-27.2	-14.6	-14.6	-15.9	no mir-795	no mir-12463
C. briggsae	GUACCCCUUUAUACAACCGUUCUACACUCA	458	-27.2	-14.6	-14.6	-15.9	no mir-795	no mir-12463
C. remanei	AGUACCCAUUAUACAACCGUUCUACACUCA	771	-28.2	-14.9	-16.2	-16	no mir-795	no mir-12463
C. latens	AGUACCCUUUAUACAACCGUUCUACACUCA	758	-27.2	-14.7	-16.1	-16	no mir-795	no mir-12463
C. wallacei	GUAUCCCUUUAUACAACCGUUCUACACUCA	863	-27.2	-17.2	-16.2	-16.2	no mir-795	no mir-12463
C. tropicalis	UAUCCCUUUUAUACAACCGUUCUACACUCA	864	-27.2	-14.6	-16.1	-16.2	no mir-795	no mir-12463
C. doughertyi	GUACCCCCUUAUACAACCGUUCUACCCUCA	612	-27.1	-13.9	-16.1	-17.7 & -21.6	no mir-795	no mir-12463
C. brenneri	UACCCCUUUUAUACAACCGUUCUACACUCA	884	-27.2	-14.6	-17.9	-16	no mir-795	no mir-12463
C. inopinata	AUACUCUUUUAUACAACCGUUCUACACUCA	807	-27.2	-14.6	-14.4	-16.2	no mir-795	no mir-12463
C. elegans	UAUACCUUUUAUACAACCGUUCUACACUCA	709	-27.2	-14.6	-17.1	-16.2	-19	no mir-12463
C. kamaaina	GUACCCUUUUAUACAACCGUUCUAUCCUCA	724	-27.2	-15.8	-17.8	-16.2	no mir-795	no mir-12463
C. waitukubuli	No Bulge-SM	not available	No let-7	not available	not available	not available	no mir-795	not available
C. panamensis	No Bulge-SM	not available	No let-7	not available	not available	not available	no mir-795	not available
C. nouraguensis	No Bulge-SM	not available	No let-7	not available	not available	not available	no mir-795	not available
C. becei	No Bulge-SM	not available	No let-7	not available	not available	not available	no mir-795	not available
C. macrosperma	GAACCCUUCUAUACAACCGUUCUACCCUCA	697	-28.6	-16	-18	-16.2	no mir-795	-16.9
C. sulstoni	No Bulge-SM	not available	No let-7	not available	not available	not available	no mir-795	not available
C. afra	No Bulge-SM	not available	No let-7	not available	not available	not available	no mir-795	not available
C. imperialis	No Bulge-SM	not available	No let-7	not available	not available	not available	no mir-795	not available
C. japonica	No Bulge-SM	not available	No let-7	not available	not available	not available	no mir-795	not available
C. uteleia	GUACCCUUUUAUACAACCGUUCUAUCCUCA	792	-27.2	no mir-48	-17.7	no mir-241	no mir-795	no mir-12463
C. guadeloupensis	GUAUUCUUUUAUACAACCGUUCUACCCUCA	608	-27.2	no mir-48	-17.1	no mir-241	no mir-795	no mir-12463
C. castelli	UAUUAUUUUUAUACAACCGUUCUAUCCUCG	426	-26.8	no mir-48	-17.2	no mir-241	no mir-795	no mir-12463
C. angaria	Unable to identify due to sequence gaps	not available	not available	no mir-48	not available	no mir-241	no mir-795	no mir-12463
C. quiockensis	UUCAUCCUUUAUACAACCGUUCUAUCCUCG	399	-26.8	no mir-48	-17.2	no mir-241	no mir-795	no mir-12463
C. vivipara	CUCUUAUUUGAUACAACCGUUCUACCCUCA	933	-25.6	no mir-48	-17.6	no mir-241	no mir-795	no mir-12463
C. virilis	UACAAUUUUUAUACAACCGUUCUAUCCUCA	637	-27.2	no mir-48	-12.4	no mir-241	no mir-795	no mir-12463
C. plicata	GUAAAAAUUUAUACAACCGUUCUAUCCUCA	706	-27.2	no mir-48	-17.8	no mir-241	no mir-795	no mir-12463
C. bovis	CCCUUGAUUUAUACAACCGUUCUACCCUCA	968	-27	no mir-48	-17.6	no mir-241	no mir-795	no mir-12463
C. parvicauda	No Bulge-SM	not available	not available	no mir-48	no mir-84	no mir-241	no mir-795	no mir-12463
C. monodelphis	UACCCCAUUUAUACAACCGUUCGUACCUCG	2257	-26.8	no mir-48	-18	no mir-241	no mir-795	no mir-12463
List of all lin-41 bulge-SM+SUP in all Caenorhabditis species used in this study. The position of the bulge-SM relative to the stop codon, and all predicted MFEs (kcal/mol) of each bulge-SM+SUP sequence hybridized with each respective let-7-family microRNA. MFEs in bold = lowest energy (most favorable). Outlined in the green box are species recovered in the Elegans group. Outlined in the red box …
